# Supplementary material for: Paradoxical activation of transcription factor SREBP1c and de novo lipogenesis by hepatocyte-selective ATP-citrate lyase depletion in obese mice
Source: PubMed Central journal article supplement (PMC9490592; doi:10.1016/j.jbc.2022.102401), 2022-08-18
Supplement: mmc1.pdf [file mmc1.pdf]

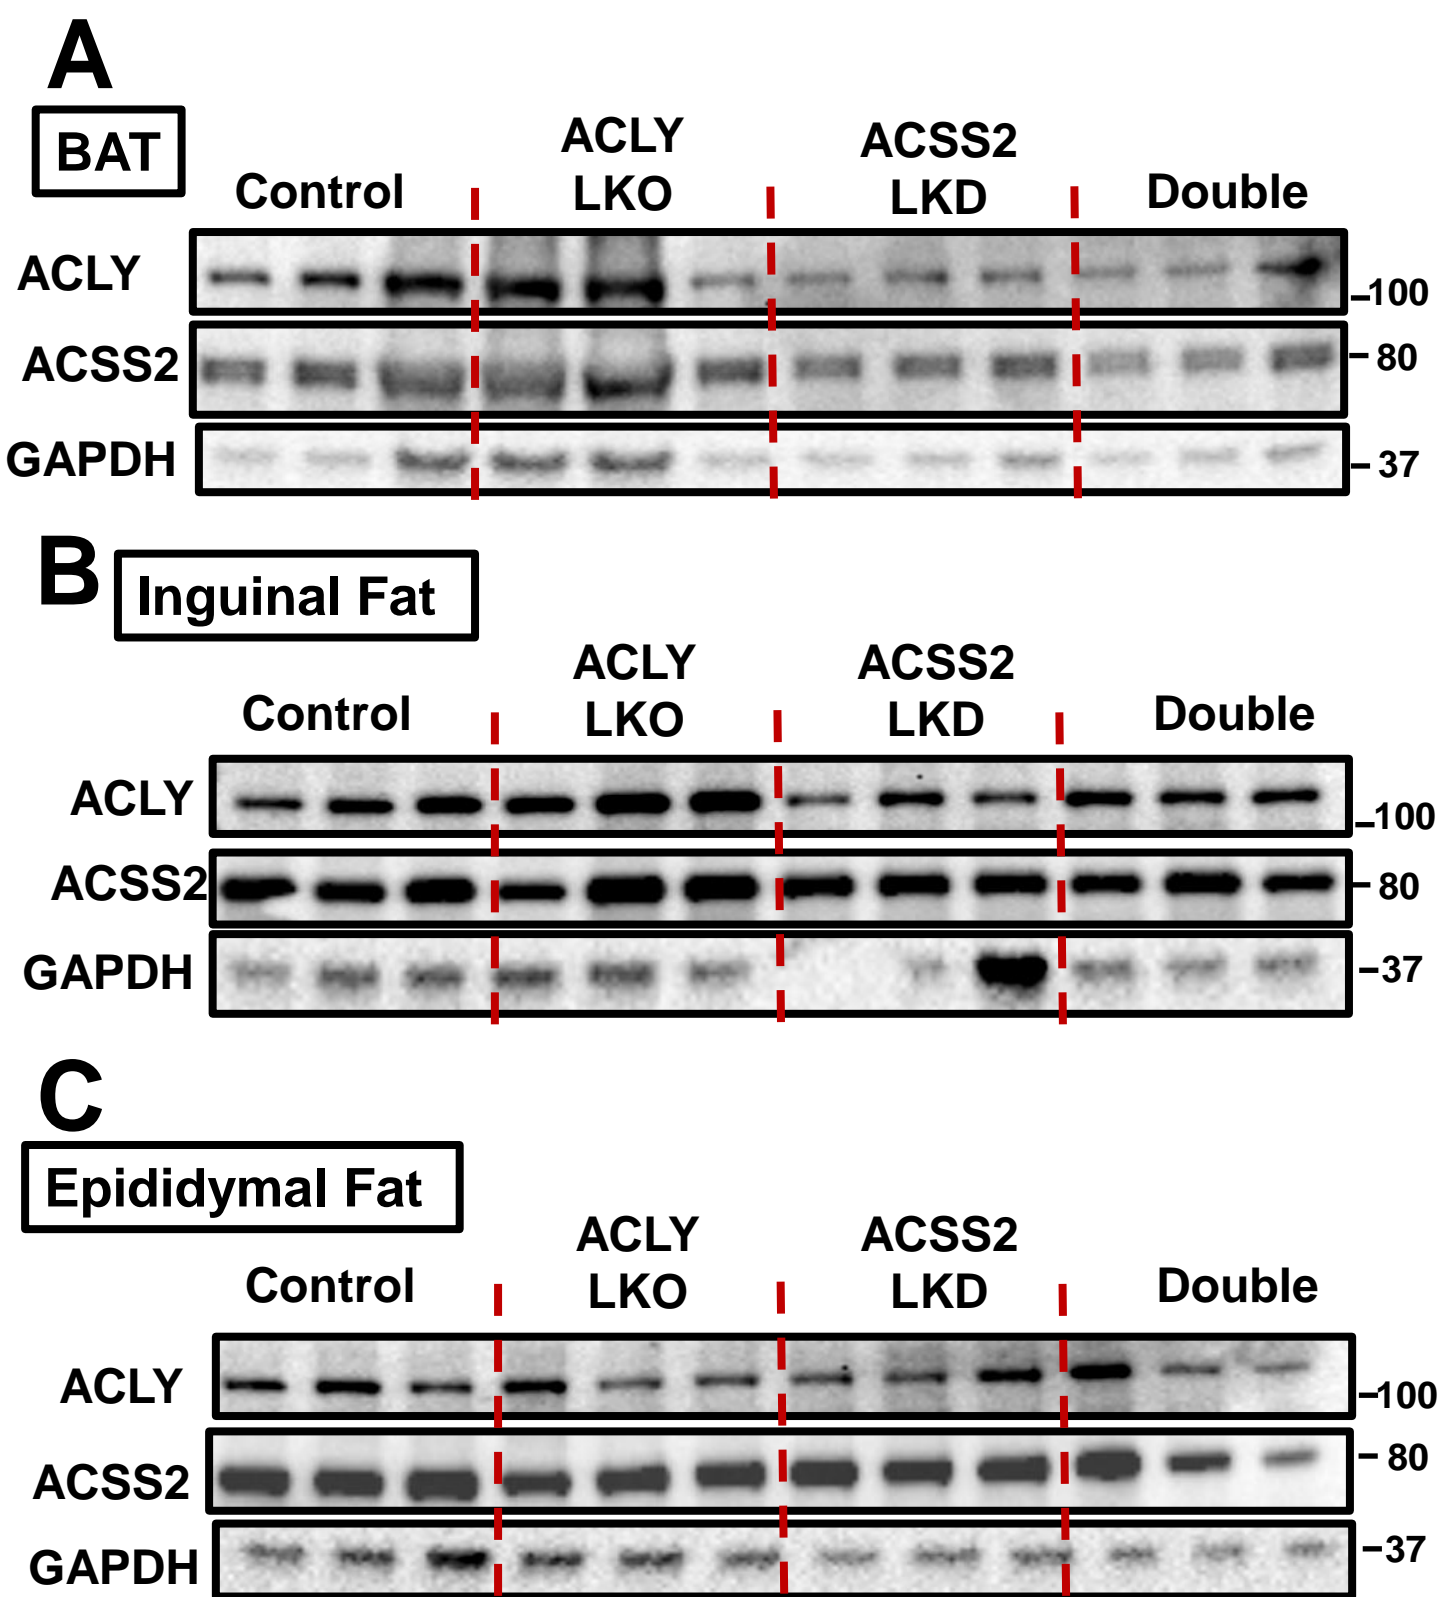

**Figure S1: Confirmation of liver specific targeting of the AAV constructs:** Immunoblots of ACLY and ACSS2 in **(A)** brown, **(B)** inguinal and **(C)** epididymal fat depots.

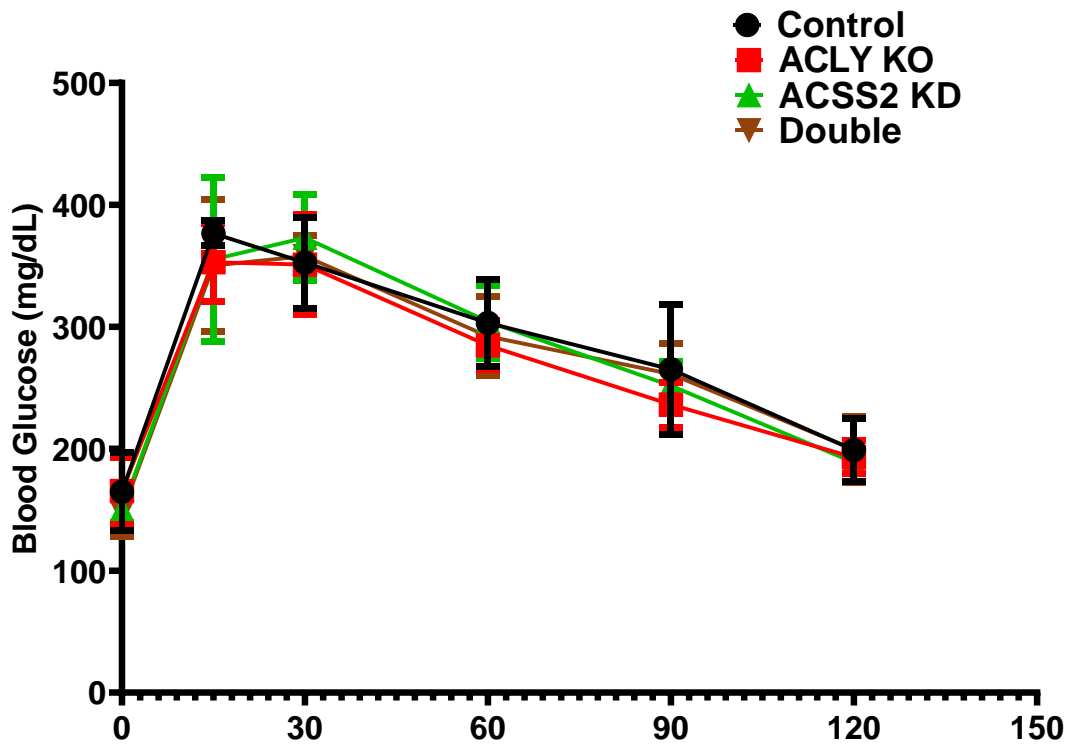

Figure S2: ACLY and/or ACSS2 depletion in HFD fed mice induced no changes in overall glucose tolerance.

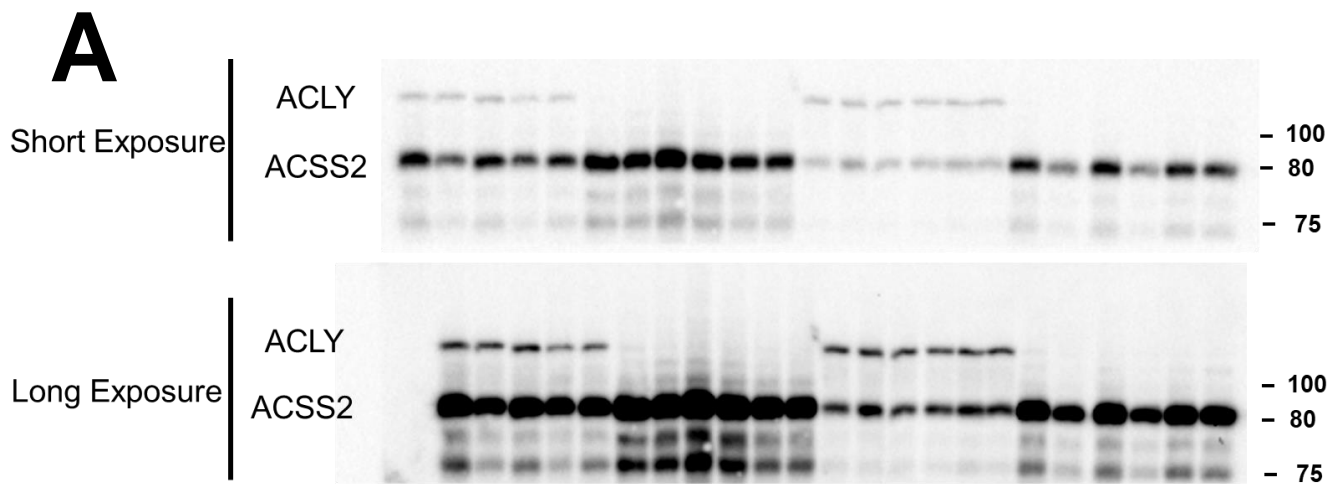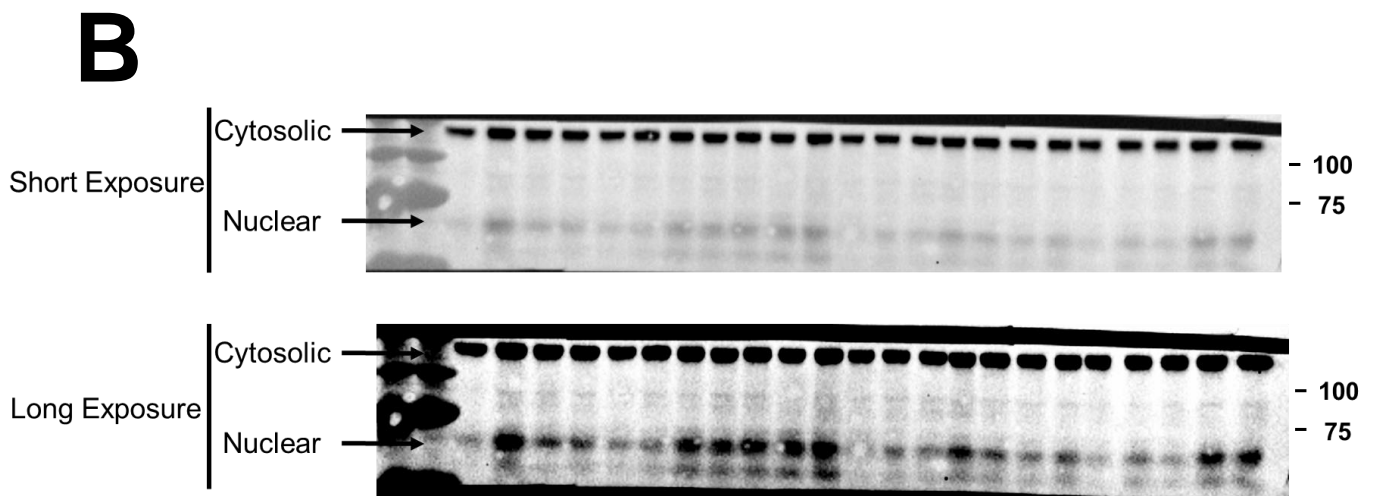

**Figure S3: Raw data of (A) ACLY & ACSS2 blots in Fig. 2E and (B) SREBP1c western blots in Fig. 4B with short and long exposures**

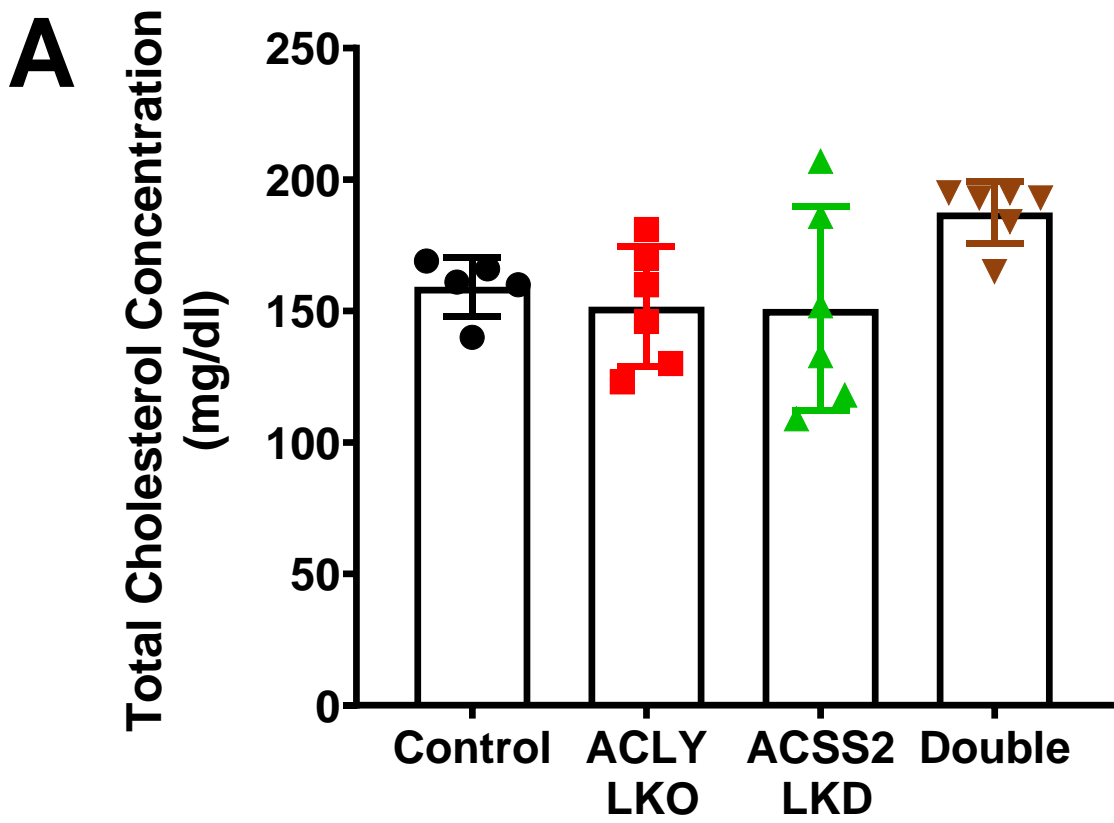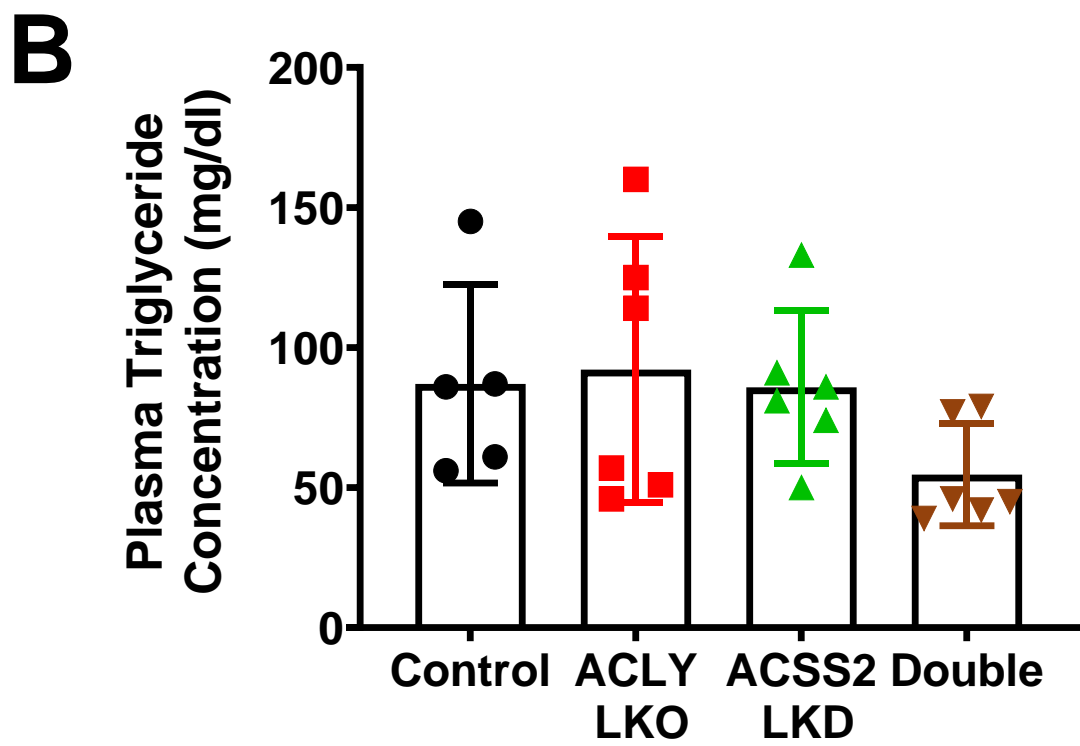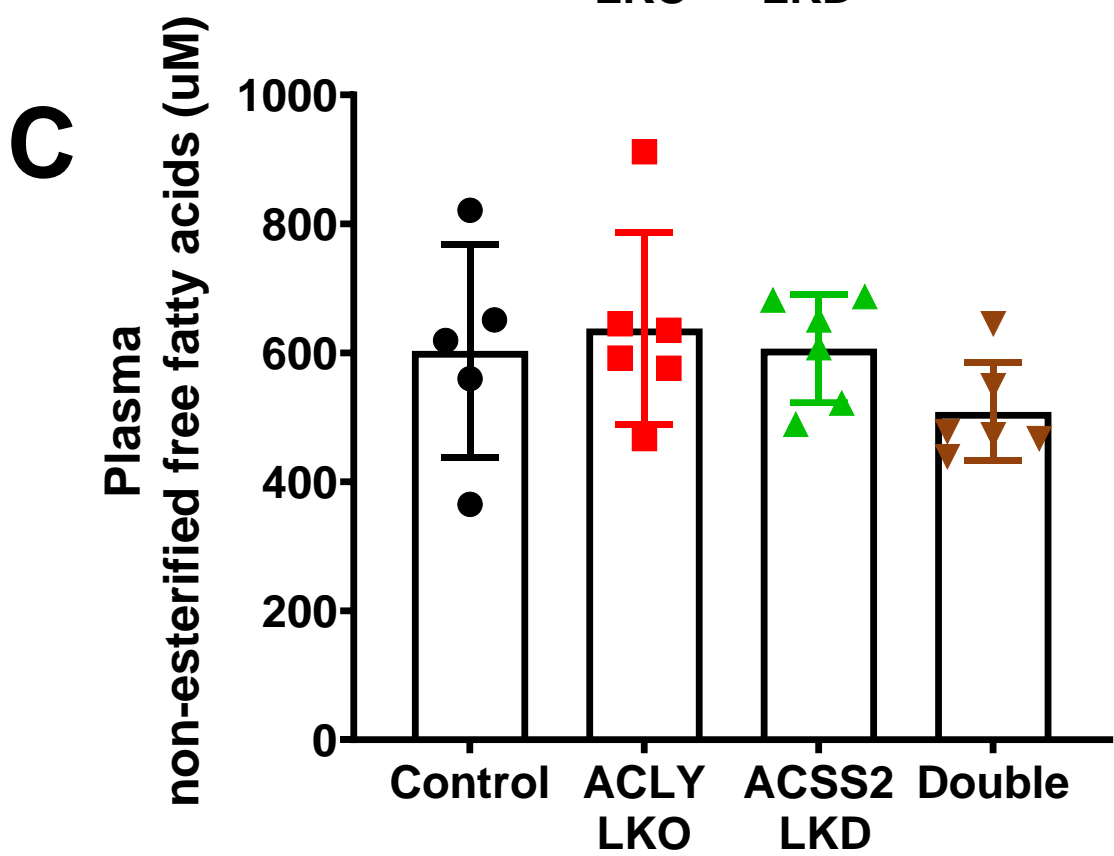

Figure S4: Liver depletion of ACLY, ACSS2 or double depletion does not change the plasma lipid profile in HFD fed mice. Plasma levels of (A) Total cholesterol, (B) TGs (C) Non esterified fatty acids.

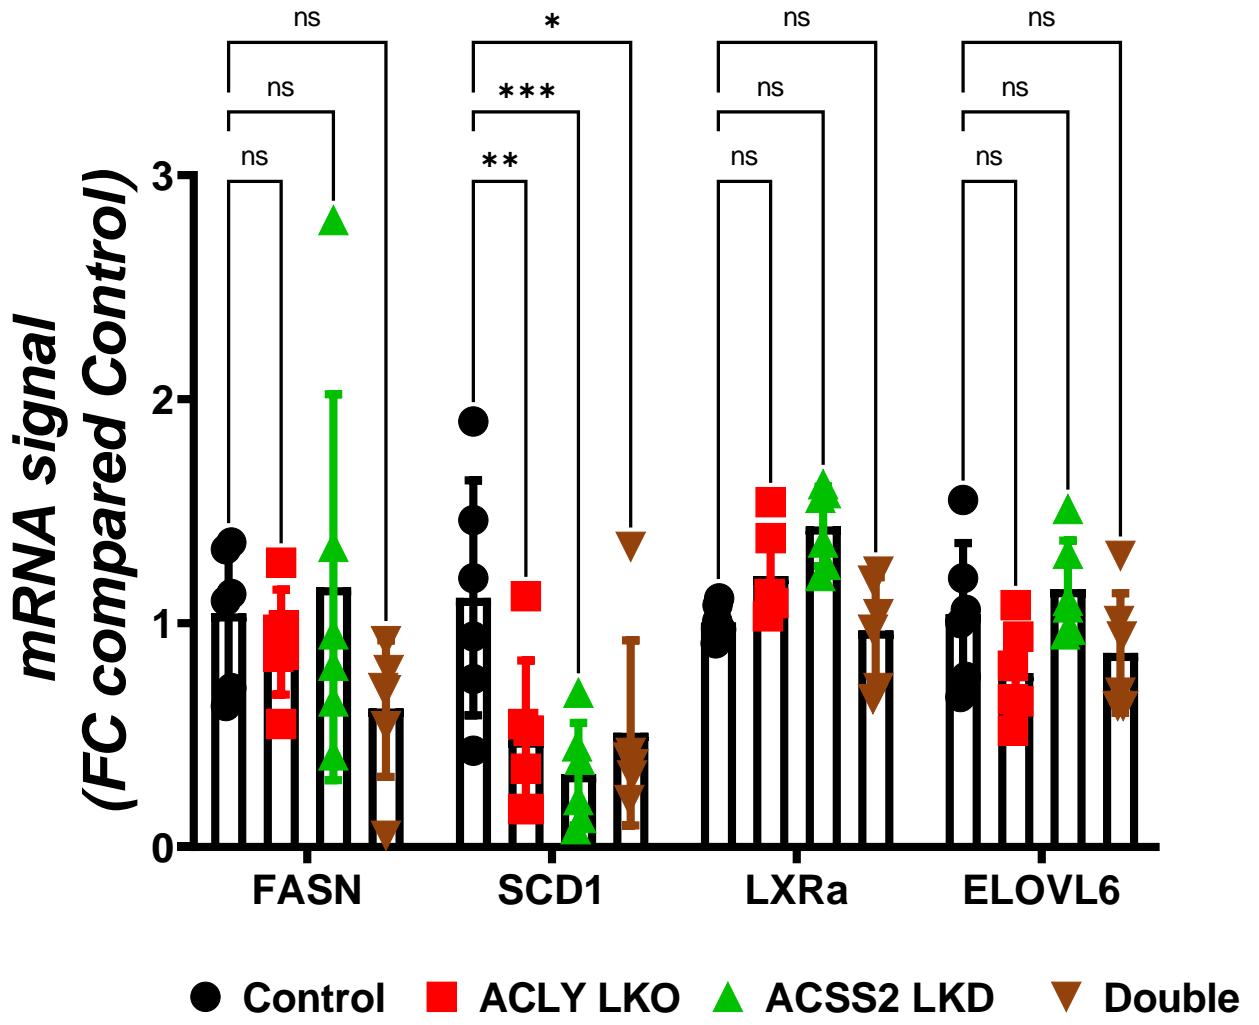

Figure S5: Liver depletion of ACLY, ACSS2 or double depletion does not induce an upregulation of DNL enzyme gene expression in CHOW fed mice.

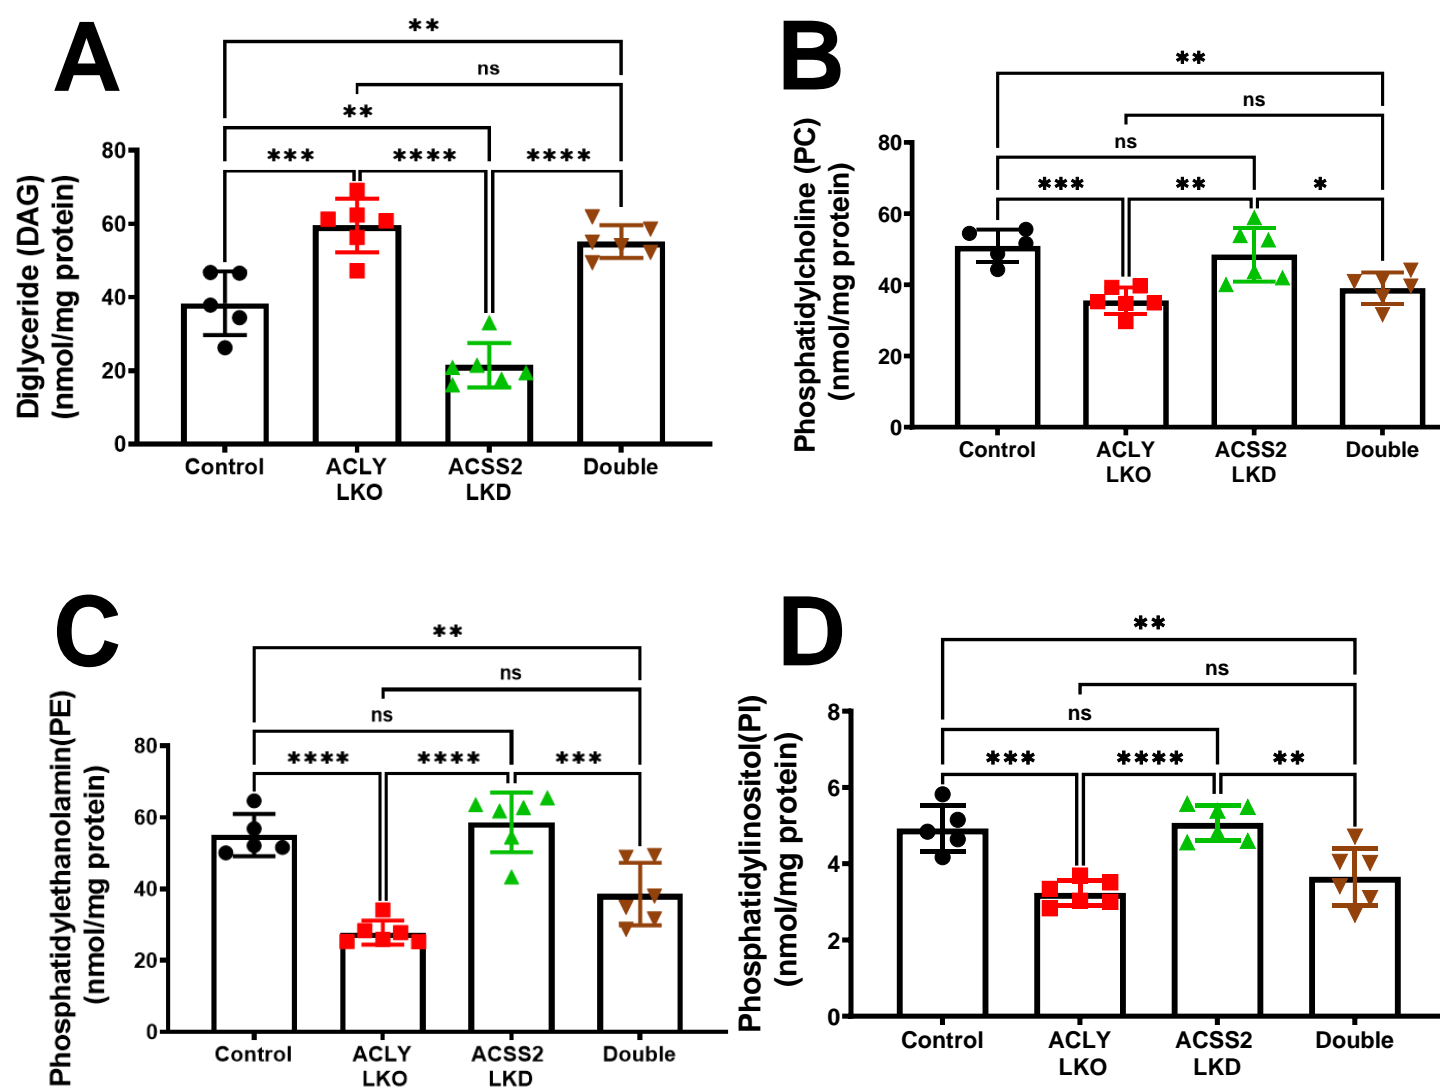

**Figure S6: Lipidomics analysis demonstrates accumulation of DAGs in ACLY-depleted but not ACSS2-depleted livers, and inverse correlation with phospholipid biosynthesis.** Liver (A) DAGs (B) Phosphatidylcholine (C) Phosphatidylethanolamine (D) Phosphatidylinositol levels in the livers of HFD fed groups. (ns: Not significant, \*:  $p < 0.05$ , \*\*:  $p < 0.005$ , \*\*\*:  $p < 0.0005$ , \*\*\*\*:  $p < 0.00005$ )

**A**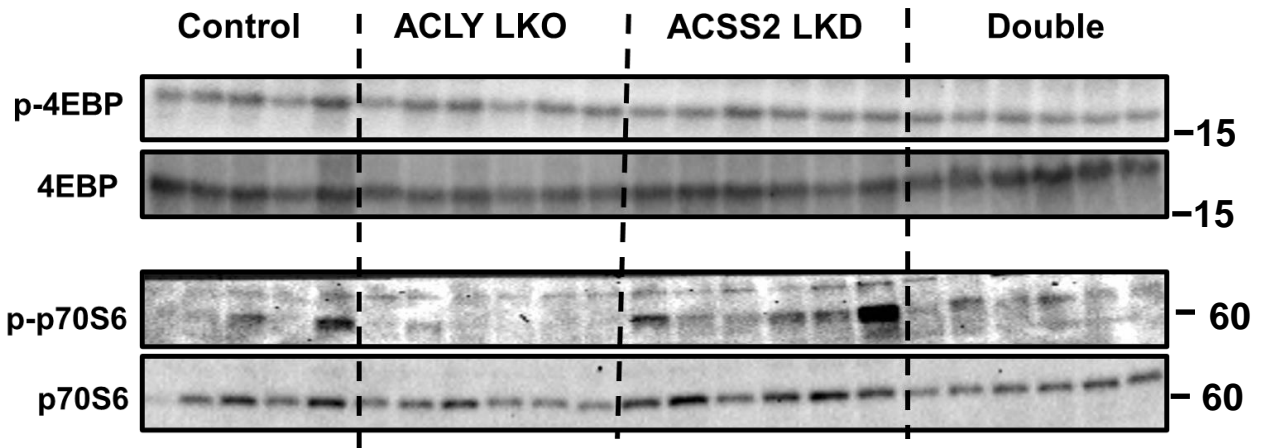**B**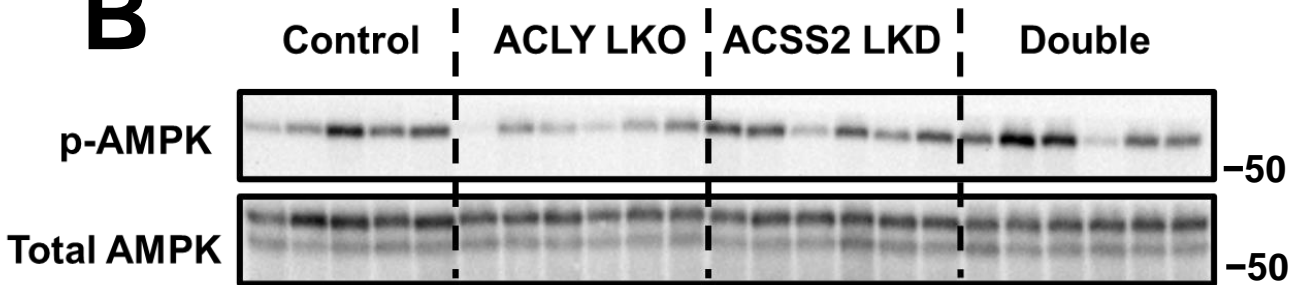**C**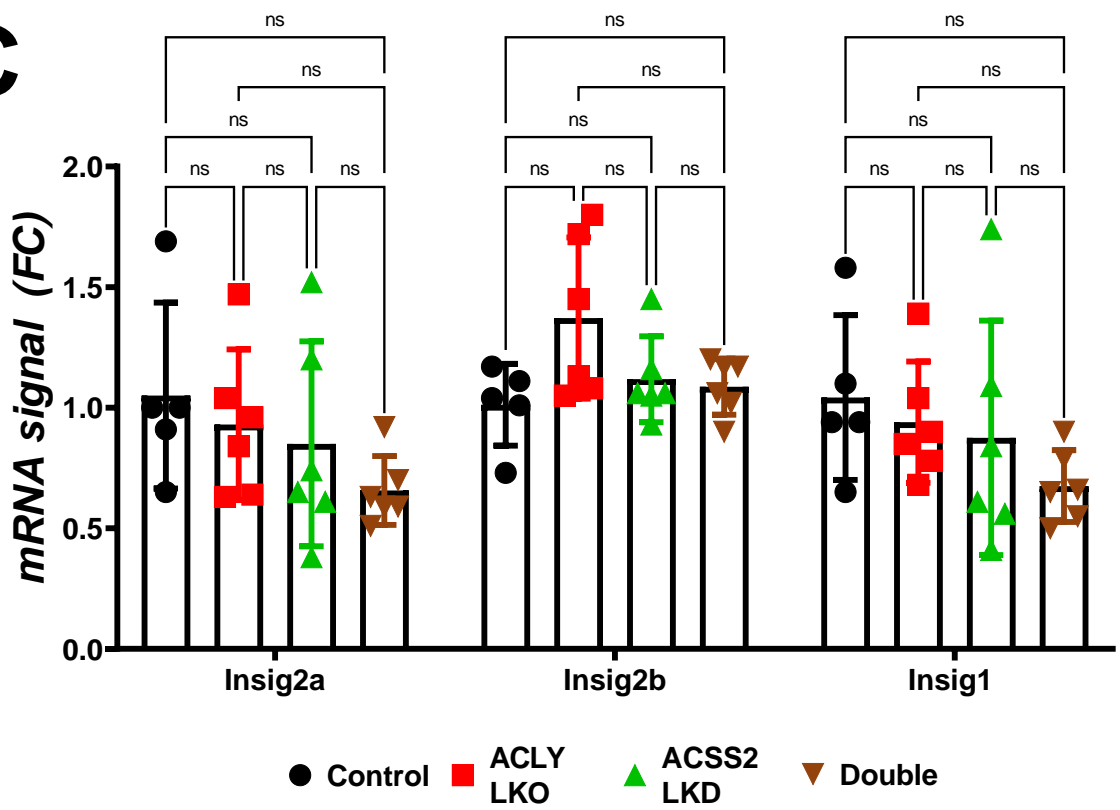

**Figure S7: Increased Srebp1c processing in ACLY depleted mice in HFD is independent of (A) mTOR activation, (B) AMPK phosphorylation or (C) Insig pathways**
